# Supplementary material for: SARS-CoV-2 Membrane Protein: From Genomic Data to Structural New Insights
Source: MDPI journal article supplement (doi:10.3390/ijms23062986), 2022-03-10
Supplement: s1 [file s1]

# SARS-CoV-2 Membrane Protein: From Genomic Data to Structural New Insights

**Table S1.** Analysis for each detected mutation in the predicted interface residues for SARS-CoV-2 M protein. This table describes the frequency of each mutation (Frequency), their mean  $\Delta\Delta G_{\text{binding}}$  values ( $\Delta\Delta G$ ), RMSF for each original residue (RMSF), solvent-accessible surface area (SASA) for each original residue in the complex (SASA<sub>cpx</sub>), SASA for each original residue in the monomer (SASA<sub>mon</sub>),  $\Delta$ SASA for each original residue ( $\Delta$ SASA), relative SASA for each original residue (relSASA), the number of interactions each original residues establish (Interactions) and the distribution of the mutation across the GISAID clades (Clade) (all the presented results are mean values  $\pm$  standard deviation).

| Mutation | Frequency | $\Delta\Delta G$  | RMSF               | SASA <sub>cpx</sub> | SASA <sub>mon</sub> | $\Delta$ SASA     | relSASA         | Interactions | Clade (%) |       |      |       |       |       |       |       |      |
|----------|-----------|-------------------|--------------------|---------------------|---------------------|-------------------|-----------------|--------------|-----------|-------|------|-------|-------|-------|-------|-------|------|
|          |           | Mean $\pm$ SD     | Mean $\pm$ SD      | Mean $\pm$ SD       | Mean $\pm$ SD       | Mean $\pm$ SD     | Mean $\pm$ SD   |              | L         | S     | V    | G     | GH    | GR    | GV    | GRY   | O    |
| I82T     | 6316      | -0.49 $\pm$ 0.38  | 91.22 $\pm$ 19.94  | 38.67 $\pm$ 15.10   | 93.09 $\pm$ 13.33   | 54.42 $\pm$ 13.27 | 0.58 $\pm$ 0.12 | 4            | 0.06      | 0.24  | 0.00 | 47.02 | 34.74 | 14.06 | 1.71  | 1.82  | 0.35 |
| V70L     | 6303      | -0.021 $\pm$ 0.22 | 86.27 $\pm$ 18.53  | 15.82 $\pm$ 13.93   | 101.45 $\pm$ 11.56  | 85.63 $\pm$ 11.01 | 0.84 $\pm$ 0.10 | 6            | 0.00      | 0.00  | 0.00 | 0.68  | 1.08  | 4.43  | 0.21  | 93.30 | 0.30 |
| V70F     | 1455      | 0.17 $\pm$ 0.47   | 86.27 $\pm$ 18.53  | 15.82 $\pm$ 13.93   | 101.45 $\pm$ 11.56  | 85.63 $\pm$ 11.01 | 0.84 $\pm$ 0.10 | 6            | 0.00      | 0.27  | 0.20 | 4.95  | 7.90  | 68.32 | 6.25  | 11.62 | 0.49 |
| A85S     | 1215      | -0.93 $\pm$ 0.30  | 79.81 $\pm$ 13.46  | 6.65 $\pm$ 4.25     | 7.85 $\pm$ 4.73     | 1.21 $\pm$ 1.56   | 0.14 $\pm$ 0.17 | 2            | 0.00      | 0.25  | 0.00 | 4.44  | 85.03 | 3.62  | 1.15  | 6.26  | 0.24 |
| M109I    | 1005      | 0.05 $\pm$ 0.20   | 118.10 $\pm$ 20.29 | 80.28 $\pm$ 22.41   | 168.22 $\pm$ 20.18  | 87.94 $\pm$ 14.46 | 0.52 $\pm$ 0.07 | 5            | 0.00      | 0.10  | 0.00 | 4.38  | 54.03 | 13.03 | 8.56  | 19.50 | 0.40 |
| A104V    | 959       | -0.09 $\pm$ 0.19  | 105.19 $\pm$ 27.34 | 48.72 $\pm$ 14.21   | 62.41 $\pm$ 13.29   | 13.69 $\pm$ 8.89  | 0.21 $\pm$ 0.13 | 1            | 0.00      | 0.00  | 0.00 | 9.28  | 10.22 | 16.16 | 39.31 | 24.82 | 0.21 |
| I82S     | 712       | -0.55 $\pm$ 0.37  | 91.22 $\pm$ 19.94  | 38.67 $\pm$ 15.10   | 93.09 $\pm$ 13.33   | 54.42 $\pm$ 13.27 | 0.58 $\pm$ 0.12 | 4            | 0.00      | 14.75 | 0.00 | 80.20 | 2.25  | 0.98  | 0.14  | 1.68  | 0.00 |
| A69S     | 574       | -1.12 $\pm$ 0.23  | 83.55 $\pm$ 16.47  | 1.59 $\pm$ 3.05     | 16.96 $\pm$ 6.77    | 15.37 $\pm$ 4.26  | 0.90 $\pm$ 0.12 | 2            | 0.17      | 0.17  | 0.00 | 9.93  | 20.38 | 23.34 | 11.85 | 33.28 | 0.88 |
| R107H    | 566       | 1.15 $\pm$ 0.68   | 122.51 $\pm$ 37.92 | 134.74 $\pm$ 27.60  | 197.33 $\pm$ 18.99  | 62.60 $\pm$ 21.03 | 0.32 $\pm$ 0.10 | 2            | 0.35      | 0.18  | 0.00 | 1.77  | 13.78 | 45.23 | 2.65  | 36.04 | 0.00 |
| V70I     | 526       | -0.06 $\pm$ 0.09  | 86.27 $\pm$ 18.53  | 15.82 $\pm$ 13.93   | 101.45 $\pm$ 11.56  | 85.63 $\pm$ 11.01 | 0.84 $\pm$ 0.10 | 6            | 0.19      | 3.80  | 0.19 | 1.33  | 3.42  | 76.81 | 8.75  | 5.51  | 0.00 |
| V66L     | 430       | -0.06 $\pm$ 0.05  | 72.96 $\pm$ 15.00  | 14.52 $\pm$ 8.56    | 72.23 $\pm$ 9.42    | 57.72 $\pm$ 5.87  | 0.80 $\pm$ 0.07 | 4            | 0.47      | 0.00  | 0.00 | 8.37  | 9.77  | 36.74 | 10.00 | 33.95 | 0.70 |
| W75L     | 382       | 0.04 $\pm$ 0.30   | 134.37 $\pm$ 26.17 | 136.35 $\pm$ 44.73  | 185.63 $\pm$ 24.99  | 49.28 $\pm$ 20.33 | 0.27 $\pm$ 0.11 | 2            | 0.00      | 10.21 | 1.05 | 6.28  | 10.99 | 14.40 | 3.93  | 53.14 | 0.00 |
| A85V     | 352       | -0.17 $\pm$ 0.07  | 79.81 $\pm$ 13.46  | 6.65 $\pm$ 4.25     | 7.85 $\pm$ 4.73     | 1.21 $\pm$ 1.56   | 0.14 $\pm$ 0.17 | 2            | 0.00      | 0.28  | 0.00 | 10.23 | 16.48 | 14.20 | 2.27  | 56.53 | 0.00 |
| A69V     | 158       | -0.15 $\pm$ 0.08  | 83.55 $\pm$ 16.47  | 1.59 $\pm$ 3.05     | 16.96 $\pm$ 6.77    | 15.37 $\pm$ 4.26  | 0.90 $\pm$ 0.12 | 2            | 0.63      | 1.90  | 1.90 | 22.78 | 9.49  | 24.68 | 5.06  | 32.91 | 0.63 |
| I97T     | 116       | -0.50 $\pm$ 0.46  | 89.75 $\pm$ 19.33  | 77.20 $\pm$ 19.03   | 96.61 $\pm$ 17.39   | 19.41 $\pm$ 6.87  | 0.20 $\pm$ 0.06 | 1            | 0.00      | 0.00  | 0.00 | 0.86  | 12.93 | 10.34 | 6.03  | 69.83 | 0.00 |
| F100L    | 64        | 0.02 $\pm$ 0.10   | 92.63 $\pm$ 24.89  | 55.87 $\pm$ 22.80   | 129.82 $\pm$ 17.14  | 73.95 $\pm$ 16.79 | 0.57 $\pm$ 0.10 | 4            | 0.00      | 0.00  | 0.00 | 25.00 | 6.25  | 9.38  | 9.38  | 50.00 | 0.00 |
| I82V     | 61        | 0.05 $\pm$ 0.05   | 91.22 $\pm$ 19.94  | 38.67 $\pm$ 15.10   | 93.09 $\pm$ 13.33   | 54.42 $\pm$ 13.27 | 0.58 $\pm$ 0.12 | 4            | 0.00      | 0.00  | 0.00 | 47.54 | 1.64  | 42.62 | 6.56  | 1.64  | 0.00 |
| I97F     | 56        | -0.01 $\pm$ 0.28  | 89.75 $\pm$ 19.33  | 77.20 $\pm$ 19.03   | 96.61 $\pm$ 17.39   | 19.41 $\pm$ 6.87  | 0.20 $\pm$ 0.06 | 1            | 0.00      | 0.00  | 0.00 | 23.21 | 5.36  | 8.93  | 12.50 | 50.00 | 0.00 |
| L93F     | 48        | -0.02 $\pm$ 0.10  | 80.02 $\pm$ 12.90  | 38.00 $\pm$ 19.35   | 107.19 $\pm$ 12.26  | 69.19 $\pm$ 9.59  | 0.65 $\pm$ 0.08 | 4            | 0.00      | 0.00  | 0.00 | 18.75 | 37.50 | 20.83 | 0.00  | 20.83 | 2.08 |

|       |    |              |                |                |                |               |             |   |      |      |      |       |       |       |        |       |       |
|-------|----|--------------|----------------|----------------|----------------|---------------|-------------|---|------|------|------|-------|-------|-------|--------|-------|-------|
| I97V  | 47 | 0.08 ± 0.11  | 89.75 ± 19.33  | 77.20 ± 19.03  | 96.61 ± 17.39  | 19.41 ± 6.87  | 0.20 ± 0.06 | 1 | 0.00 | 0.00 | 0.00 | 4.26  | 14.89 | 68.09 | 0.00   | 8.51  | 4.26  |
| V70A  | 45 | 0.16 ± 0.12  | 86.27 ± 18.53  | 15.82 ± 13.93  | 101.45 ± 11.56 | 85.63 ± 11.01 | 0.84 ± 0.10 | 6 | 0.00 | 2.22 | 0.00 | 26.67 | 51.11 | 6.67  | 0.00   | 0.00  | 13.33 |
| V66M  | 40 | -0.07 ± 0.06 | 72.96 ± 15.00  | 14.52 ± 8.56   | 72.23 ± 9.42   | 57.72 ± 5.87  | 0.80 ± 0.07 | 4 | 0.00 | 0.00 | 0.00 | 5.00  | 40.00 | 17.50 | 0.00   | 37.50 | 0.00  |
| M109L | 38 | 0.04 ± 0.16  | 118.10 ± 20.29 | 80.28 ± 22.41  | 168.22 ± 20.18 | 87.94 ± 14.46 | 0.52 ± 0.07 | 5 | 0.00 | 0.00 | 0.00 | 0.00  | 7.89  | 13.16 | 2.63   | 76.32 | 0.00  |
| M109V | 38 | 0.08 ± 0.28  | 118.10 ± 20.29 | 80.28 ± 22.41  | 168.22 ± 20.18 | 87.94 ± 14.46 | 0.52 ± 0.07 | 5 | 0.00 | 0.00 | 0.00 | 13.16 | 31.58 | 21.05 | 2.63   | 31.58 | 0.00  |
| A85T  | 30 | -0.49 ± 0.30 | 79.81 ± 13.46  | 6.65 ± 4.25    | 7.85 ± 4.73    | 1.21 ± 1.56   | 0.14 ± 0.17 | 2 | 0.00 | 0.00 | 0.00 | 3.33  | 23.33 | 3.33  | 10.00  | 60.00 | 0.00  |
| F100S | 29 | -0.78 ± 0.33 | 92.63 ± 24.89  | 55.87 ± 22.80  | 129.82 ± 17.14 | 73.95 ± 16.79 | 0.57 ± 0.10 | 4 | 0.00 | 0.00 | 0.00 | 6.90  | 68.97 | 13.79 | 0.00   | 10.34 | 0.00  |
| W75S  | 28 | 0.02 ± 0.32  | 134.37 ± 26.17 | 136.35 ± 44.73 | 185.63 ± 24.99 | 49.28 ± 20.33 | 0.27 ± 0.11 | 2 | 0.00 | 0.00 | 0.00 | 3.57  | 14.29 | 21.43 | 0.00   | 60.71 | 0.00  |
| R107L | 21 | 1.85 ± 0.51  | 122.51 ± 37.92 | 134.74 ± 27.60 | 197.33 ± 18.99 | 62.60 ± 21.03 | 0.32 ± 0.10 | 2 | 0.00 | 0.00 | 0.00 | 9.52  | 42.86 | 23.81 | 4.76   | 14.29 | 4.76  |
| L67F  | 21 | 0.02 ± 0.08  | 76.67 ± 17.80  | 65.01 ± 14.59  | 80.66 ± 13.06  | 15.65 ± 5.30  | 0.19 ± 0.06 | 1 | 0.00 | 0.00 | 0.00 | 9.52  | 33.33 | 14.29 | 19.05  | 23.81 | 0.00  |
| V66A  | 21 | 0.21 ± 0.08  | 72.96 ± 15.00  | 14.52 ± 8.56   | 72.23 ± 9.42   | 57.72 ± 5.87  | 0.80 ± 0.07 | 4 | 0.00 | 0.00 | 0.00 | 4.76  | 66.67 | 9.52  | 4.76   | 14.29 | 0.00  |
| W55L  | 20 | -0.03 ± 0.13 | 90.56 ± 16.30  | 45.24 ± 23.00  | 112.80 ± 19.40 | 67.56 ± 16.61 | 0.60 ± 0.15 | 3 | 0.00 | 0.00 | 0.00 | 0.00  | 10.00 | 35.00 | 0.00   | 55.00 | 0.00  |
| L67I  | 12 | -0.04 ± 0.12 | 76.67 ± 17.80  | 65.01 ± 14.59  | 80.66 ± 13.06  | 15.65 ± 5.30  | 0.19 ± 0.06 | 1 | 0.00 | 0.00 | 0.00 | 8.33  | 91.67 | 0.00  | 0.00   | 0.00  | 0.00  |
| W55C  | 12 | -0.13 ± 0.20 | 90.56 ± 16.30  | 45.24 ± 23.00  | 112.80 ± 19.40 | 67.56 ± 16.61 | 0.60 ± 0.15 | 3 | 0.00 | 0.00 | 0.00 | 25.00 | 8.33  | 8.33  | 0.00   | 58.33 | 0.00  |
| A104S | 10 | -0.91 ± 0.38 | 105.19 ± 27.34 | 48.72 ± 14.21  | 62.41 ± 13.29  | 13.69 ± 8.89  | 0.21 ± 0.13 | 1 | 0.00 | 0.00 | 0.00 | 0.00  | 60.00 | 10.00 | 10.00  | 20.00 | 0.00  |
| Y71H  | 10 | -0.90 ± 0.50 | 92.35 ± 19.94  | 56.84 ± 28.93  | 84.97 ± 34.74  | 28.12 ± 10.60 | 0.34 ± 0.13 | 1 | 0.00 | 0.00 | 0.00 | 0.00  | 30.00 | 0.00  | 10.00  | 60.00 | 0.00  |
| W75R  | 9  | 0.05 ± 0.33  | 134.37 ± 26.17 | 136.35 ± 44.73 | 185.63 ± 24.99 | 49.28 ± 20.33 | 0.27 ± 0.11 | 2 | 0.00 | 0.00 | 0.00 | 33.33 | 33.33 | 11.11 | 0.00   | 22.22 | 0.00  |
| V66G  | 9  | 0.32 ± 0.10  | 72.96 ± 15.00  | 14.52 ± 8.56   | 72.23 ± 9.42   | 57.72 ± 5.87  | 0.80 ± 0.07 | 4 | 0.00 | 0.00 | 0.00 | 11.11 | 33.33 | 44.44 | 0.00   | 0.00  | 11.11 |
| L93M  | 8  | -0.01 ± 0.07 | 80.02 ± 12.90  | 38.00 ± 19.35  | 107.19 ± 12.26 | 69.19 ± 9.59  | 0.65 ± 0.08 | 4 | 0.00 | 0.00 | 0.00 | 0.00  | 0.00  | 0.00  | 100.00 | 0.00  | 0.00  |
| F112L | 7  | 0.01 ± 0.28  | 103.70 ± 34.74 | 23.38 ± 21.40  | 80.51 ± 27.54  | 57.14 ± 10.26 | 0.73 ± 0.15 | 4 | 0.00 | 0.00 | 0.00 | 28.57 | 28.57 | 0.00  | 0.00   | 28.57 | 14.29 |
| M109T | 7  | 0.08 ± 0.28  | 118.10 ± 20.29 | 80.28 ± 22.41  | 168.22 ± 20.18 | 87.94 ± 14.46 | 0.52 ± 0.07 | 5 | 0.00 | 0.00 | 0.00 | 14.29 | 28.57 | 0.00  | 0.00   | 57.14 | 0.00  |
| R107C | 6  | 1.78 ± 0.49  | 122.51 ± 37.92 | 134.74 ± 27.60 | 197.33 ± 18.99 | 62.60 ± 21.03 | 0.32 ± 0.10 | 2 | 0.00 | 0.00 | 0.00 | 0.00  | 16.67 | 50.00 | 16.67  | 16.67 | 0.00  |
| I97M  | 6  | -0.12 ± 0.31 | 89.75 ± 19.33  | 77.20 ± 19.03  | 96.61 ± 17.39  | 19.41 ± 6.87  | 0.20 ± 0.06 | 1 | 0.00 | 0.00 | 0.00 | 0.00  | 0.00  | 66.67 | 0.00   | 33.33 | 0.00  |
| A85D  | 6  | -0.06 ± 0.07 | 79.81 ± 13.46  | 6.65 ± 4.25    | 7.85 ± 4.73    | 1.21 ± 1.56   | 0.14 ± 0.17 | 2 | 0.00 | 0.00 | 0.00 | 16.67 | 83.33 | 0.00  | 0.00   | 0.00  | 0.00  |
| F112Y | 5  | -0.09 ± 0.27 | 103.70 ± 34.74 | 23.38 ± 21.40  | 80.51 ± 27.54  | 57.14 ± 10.26 | 0.73 ± 0.15 | 4 | 0.00 | 0.00 | 0.00 | 0.00  | 40.00 | 20.00 | 0.00   | 40.00 | 0.00  |
| W75C  | 5  | 0.03 ± 0.28  | 134.37 ± 26.17 | 136.35 ± 44.73 | 185.63 ± 24.99 | 49.28 ± 20.33 | 0.27 ± 0.11 | 2 | 0.00 | 0.00 | 0.00 | 20.00 | 80.00 | 0.00  | 0.00   | 0.00  | 0.00  |
| A69T  | 5  | -0.92 ± 0.34 | 83.55 ± 16.47  | 1.59 ± 3.05    | 16.96 ± 6.77   | 15.37 ± 4.26  | 0.90 ± 0.12 | 2 | 0.00 | 0.00 | 0.00 | 0.00  | 0.00  | 0.00  | 20.00  | 80.00 | 0.00  |
| A69P  | 5  | 1.00 ± 0.71  | 83.55 ± 16.47  | 1.59 ± 3.05    | 16.96 ± 6.77   | 15.37 ± 4.26  | 0.90 ± 0.12 | 2 | 0.00 | 0.00 | 0.00 | 0.00  | 0.00  | 0.00  | 100.00 | 0.00  | 0.00  |
| L67Y  | 5  | 0.01 ± 0.11  | 76.67 ± 17.80  | 65.01 ± 14.59  | 80.66 ± 13.06  | 15.65 ± 5.30  | 0.19 ± 0.06 | 1 | 0.00 | 0.00 | 0.00 | 20.00 | 20.00 | 0.00  | 20.00  | 20.00 | 20.00 |
| A104T | 4  | -0.63 ± 0.44 | 105.19 ± 27.34 | 48.72 ± 14.21  | 62.41 ± 13.29  | 13.69 ± 8.89  | 0.21 ± 0.13 | 1 | 0.00 | 0.00 | 0.00 | 0.00  | 0.00  | 50.00 | 25.00  | 25.00 | 0.00  |

|       |   |              |                |                |                |               |             |   |      |       |      |        |        |        |        |        |        |
|-------|---|--------------|----------------|----------------|----------------|---------------|-------------|---|------|-------|------|--------|--------|--------|--------|--------|--------|
| F103Y | 4 | -0.31 ± 0.36 | 95.69 ± 21.66  | 6.41 ± 6.87    | 78.93 ± 14.74  | 72.52 ± 8.95  | 0.92 ± 0.04 | 6 | 0.00 | 0.00  | 0.00 | 0.00   | 50.00  | 25.00  | 0.00   | 25.00  | 0.00   |
| F100C | 3 | 0.07 ± 0.21  | 92.63 ± 24.89  | 55.87 ± 22.80  | 129.82 ± 17.14 | 73.95 ± 16.79 | 0.57 ± 0.10 | 4 | 0.00 | 0.00  | 0.00 | 0.00   | 0.00   | 0.00   | 100.00 | 0.00   | 0.00   |
| I82M  | 3 | 0.00 ± 0.06  | 91.22 ± 19.94  | 38.67 ± 15.10  | 93.09 ± 13.33  | 54.42 ± 13.27 | 0.58 ± 0.12 | 4 | 0.00 | 0.00  | 0.00 | 0.00   | 0.00   | 100.00 | 0.00   | 0.00   | 0.00   |
| Y71C  | 3 | 0.05 ± 0.18  | 92.35 ± 19.94  | 56.84 ± 28.93  | 84.97 ± 34.74  | 28.12 ± 10.60 | 0.34 ± 0.13 | 1 | 0.00 | 66.67 | 0.00 | 0.00   | 33.33  | 0.00   | 0.00   | 0.00   | 0.00   |
| L62S  | 3 | -0.62 ± 0.34 | 71.67 ± 9.75   | 25.27 ± 7.76   | 46.13 ± 12.86  | 20.86 ± 7.36  | 0.45 ± 0.12 | 1 | 0.00 | 0.00  | 0.00 | 0.00   | 33.33  | 66.67  | 0.00   | 0.00   | 0.00   |
| L62I  | 3 | 0.03 ± 0.09  | 71.67 ± 9.75   | 25.27 ± 7.76   | 46.13 ± 12.86  | 20.86 ± 7.36  | 0.45 ± 0.12 | 1 | 0.00 | 0.00  | 0.00 | 0.00   | 33.33  | 0.00   | 33.33  | 33.33  | 0.00   |
| R107S | 2 | 1.21 ± 0.62  | 122.51 ± 37.92 | 134.74 ± 27.60 | 197.33 ± 18.99 | 62.60 ± 21.03 | 0.32 ± 0.10 | 2 | 0.00 | 0.00  | 0.00 | 0.00   | 100.00 | 0.00   | 0.00   | 0.00   | 0.00   |
| F103V | 2 | 0.05 ± 0.40  | 95.69 ± 21.66  | 6.41 ± 6.87    | 78.93 ± 14.74  | 72.52 ± 8.95  | 0.92 ± 0.04 | 6 | 0.00 | 0.00  | 0.00 | 50.00  | 0.00   | 50.00  | 0.00   | 0.00   | 0.00   |
| I97R  | 2 | -0.31 ± 0.55 | 89.75 ± 19.33  | 77.20 ± 19.03  | 96.61 ± 17.39  | 19.41 ± 6.87  | 0.20 ± 0.06 | 1 | 0.00 | 0.00  | 0.00 | 0.00   | 0.00   | 100.00 | 0.00   | 0.00   | 0.00   |
| L93P  | 2 | 2.29 ± 0.30  | 80.02 ± 12.90  | 38.00 ± 19.35  | 107.19 ± 12.26 | 69.19 ± 9.59  | 0.65 ± 0.08 | 4 | 0.00 | 0.00  | 0.00 | 0.00   | 0.00   | 0.00   | 0.00   | 50.00  | 50.00  |
| A69D  | 2 | -0.14 ± 0.20 | 83.55 ± 16.47  | 1.59 ± 3.05    | 16.96 ± 6.77   | 15.37 ± 4.26  | 0.90 ± 0.12 | 2 | 0.00 | 0.00  | 0.00 | 50.00  | 0.00   | 0.00   | 0.00   | 0.00   | 50.00  |
| V66F  | 2 | -0.10 ± 0.07 | 72.96 ± 15.00  | 14.52 ± 8.56   | 72.23 ± 9.42   | 57.72 ± 5.87  | 0.80 ± 0.07 | 4 | 0.00 | 0.00  | 0.00 | 0.00   | 0.00   | 0.00   | 50.00  | 50.00  | 0.00   |
| F112C | 1 | 0.02 ± 0.32  | 103.70 ± 34.74 | 23.38 ± 21.40  | 80.51 ± 27.54  | 57.14 ± 10.26 | 0.73 ± 0.15 | 4 | 0.00 | 0.00  | 0.00 | 0.00   | 0.00   | 100.00 | 0.00   | 0.00   | 0.00   |
| F112S | 1 | -0.34 ± 0.45 | 103.70 ± 34.74 | 23.38 ± 21.40  | 80.51 ± 27.54  | 57.14 ± 10.26 | 0.73 ± 0.15 | 4 | 0.00 | 0.00  | 0.00 | 0.00   | 0.00   | 100.00 | 0.00   | 0.00   | 0.00   |
| S111L | 1 | 0.99 ± 0.47  | 102.15 ± 24.07 | 1.94 ± 3.03    | 3.21 ± 4.80    | 1.27 ± 1.80   | 0.34 ± 0.36 | 1 | 0.00 | 0.00  | 0.00 | 100.00 | 0.00   | 0.00   | 0.00   | 0.00   | 0.00   |
| S108F | 1 | 0.82 ± 0.55  | 120.22 ± 27.48 | 13.54 ± 7.55   | 18.53 ± 8.82   | 4.98 ± 4.53   | 0.27 ± 0.23 | 1 | 0.00 | 0.00  | 0.00 | 0.00   | 0.00   | 100.00 | 0.00   | 0.00   | 0.00   |
| S108A | 1 | 0.89 ± 0.30  | 120.22 ± 27.48 | 13.54 ± 7.55   | 18.53 ± 8.82   | 4.98 ± 4.53   | 0.27 ± 0.23 | 1 | 0.00 | 0.00  | 0.00 | 0.00   | 0.00   | 0.00   | 100.00 | 0.00   | 0.00   |
| A104L | 1 | -0.15 ± 0.17 | 105.19 ± 27.34 | 48.72 ± 14.21  | 62.41 ± 13.29  | 13.69 ± 8.89  | 0.21 ± 0.13 | 1 | 0.00 | 0.00  | 0.00 | 100.00 | 0.00   | 0.00   | 0.00   | 0.00   | 0.00   |
| F103L | 1 | 0.02 ± 0.35  | 95.69 ± 21.66  | 6.41 ± 6.87    | 78.93 ± 14.74  | 72.52 ± 8.95  | 0.92 ± 0.04 | 6 | 0.00 | 0.00  | 0.00 | 0.00   | 100.00 | 0.00   | 0.00   | 0.00   | 0.00   |
| F100V | 1 | 0.05 ± 0.18  | 92.63 ± 24.89  | 55.87 ± 22.80  | 129.82 ± 17.14 | 73.95 ± 16.79 | 0.57 ± 0.10 | 4 | 0.00 | 0.00  | 0.00 | 0.00   | 0.00   | 100.00 | 0.00   | 0.00   | 0.00   |
| F100I | 1 | -0.03 ± 0.15 | 92.63 ± 24.89  | 55.87 ± 22.80  | 129.82 ± 17.14 | 73.95 ± 16.79 | 0.57 ± 0.10 | 4 | 0.00 | 0.00  | 0.00 | 0.00   | 0.00   | 100.00 | 0.00   | 0.00   | 0.00   |
| I97S  | 1 | -0.74 ± 0.42 | 89.75 ± 19.33  | 77.20 ± 19.03  | 96.61 ± 17.39  | 19.41 ± 6.87  | 0.20 ± 0.06 | 1 | 0.00 | 0.00  | 0.00 | 0.00   | 0.00   | 100.00 | 0.00   | 0.00   | 0.00   |
| F96L  | 1 | -0.05 ± 0.11 | 85.95 ± 21.44  | 13.54 ± 7.55   | 18.53 ± 8.82   | 4.98 ± 4.53   | 0.27 ± 0.23 | 3 | 0.00 | 0.00  | 0.00 | 0.00   | 0.00   | 0.00   | 0.00   | 0.00   | 100.00 |
| L93S  | 1 | -0.76 ± 0.30 | 80.02 ± 12.90  | 38.00 ± 19.35  | 107.19 ± 12.26 | 69.19 ± 9.59  | 0.65 ± 0.08 | 4 | 0.00 | 0.00  | 0.00 | 0.00   | 0.00   | 0.00   | 100.00 | 0.00   | 0.00   |
| L93R  | 1 | -0.47 ± 0.62 | 80.02 ± 12.90  | 38.00 ± 19.35  | 107.19 ± 12.26 | 69.19 ± 9.59  | 0.65 ± 0.08 | 4 | 0.00 | 0.00  | 0.00 | 0.00   | 0.00   | 100.00 | 0.00   | 0.00   | 0.00   |
| L93I  | 1 | -0.06 ± 0.08 | 80.02 ± 12.90  | 38.00 ± 19.35  | 107.19 ± 12.26 | 69.19 ± 9.59  | 0.65 ± 0.08 | 4 | 0.00 | 0.00  | 0.00 | 100.00 | 0.00   | 0.00   | 0.00   | 0.00   | 0.00   |
| W92G  | 1 | 0.34 ± 0.23  | 77.61 ± 11.10  | 11.91 ± 8.36   | 67.96 ± 16.30  | 56.05 ± 9.67  | 0.83 ± 0.08 | 2 | 0.00 | 0.00  | 0.00 | 0.00   | 0.00   | 100.00 | 0.00   | 0.00   | 0.00   |
| W92L  | 1 | -0.03 ± 0.12 | 77.61 ± 11.10  | 11.91 ± 8.36   | 67.96 ± 16.30  | 56.05 ± 9.67  | 0.83 ± 0.08 | 2 | 0.00 | 0.00  | 0.00 | 0.00   | 0.00   | 0.00   | 0.00   | 100.00 | 0.00   |
| W92R  | 1 | -0.32 ± 0.49 | 77.61 ± 11.10  | 11.91 ± 8.36   | 67.96 ± 16.30  | 56.05 ± 9.67  | 0.83 ± 0.08 | 2 | 0.00 | 0.00  | 0.00 | 0.00   | 0.00   | 0.00   | 0.00   | 0.00   | 100.00 |
| W92Q  | 1 | -0.59 ± 0.49 | 77.61 ± 11.10  | 11.91 ± 8.36   | 67.96 ± 16.30  | 56.05 ± 9.67  | 0.83 ± 0.08 | 2 | 0.00 | 0.00  | 0.00 | 100.00 | 0.00   | 0.00   | 0.00   | 0.00   | 0.00   |

|      |   |              |                |               |               |               |             |   |      |      |      |        |        |        |      |        |      |
|------|---|--------------|----------------|---------------|---------------|---------------|-------------|---|------|------|------|--------|--------|--------|------|--------|------|
| A85G | 1 | 0.13 ± 0.06  | 79.81 ± 13.46  | 6.65 ± 4.25   | 7.85 ± 4.73   | 1.21 ± 1.56   | 0.14 ± 0.17 | 2 | 0.00 | 0.00 | 0.00 | 0.00   | 0.00   | 100.00 | 0.00 | 0.00   | 0.00 |
| I82F | 1 | 0.06 ± 0.10  | 91.22 ± 19.94  | 38.67 ± 15.10 | 93.09 ± 13.33 | 54.42 ± 13.27 | 0.58 ± 0.12 | 4 | 0.00 | 0.00 | 0.00 | 0.00   | 0.00   | 100.00 | 0.00 | 0.00   | 0.00 |
| I82A | 1 | 0.15 ± 0.07  | 91.22 ± 19.94  | 38.67 ± 15.10 | 93.09 ± 13.33 | 54.42 ± 13.27 | 0.58 ± 0.12 | 4 | 0.00 | 0.00 | 0.00 | 0.00   | 0.00   | 100.00 | 0.00 | 0.00   | 0.00 |
| W75G | 1 | 0.09 ± 0.32  | 134.37 ± 26.17 | 11.91 ± 8.36  | 67.96 ± 16.30 | 56.05 ± 9.67  | 0.83 ± 0.08 | 2 | 0.00 | 0.00 | 0.00 | 0.00   | 0.00   | 100.00 | 0.00 | 0.00   | 0.00 |
| A69F | 1 | -0.16 ± 0.31 | 83.55 ± 16.47  | 1.59 ± 3.05   | 16.96 ± 6.77  | 15.37 ± 4.26  | 0.90 ± 0.12 | 2 | 0.00 | 0.00 | 0.00 | 0.00   | 0.00   | 0.00   | 0.00 | 100.00 | 0.00 |
| A69G | 1 | 0.16 ± 0.07  | 83.55 ± 16.47  | 1.59 ± 3.05   | 16.96 ± 6.77  | 15.37 ± 4.26  | 0.90 ± 0.12 | 2 | 0.00 | 0.00 | 0.00 | 100.00 | 0.00   | 0.00   | 0.00 | 0.00   | 0.00 |
| L67H | 1 | -1.07 ± 0.43 | 76.67 ± 17.80  | 65.01 ± 14.59 | 80.66 ± 13.06 | 15.65 ± 5.30  | 0.19 ± 0.06 | 1 | 0.00 | 0.00 | 0.00 | 0.00   | 100.00 | 0.00   | 0.00 | 0.00   | 0.00 |
| L67P | 1 | 2.37 ± 0.34  | 76.67 ± 17.80  | 65.01 ± 14.59 | 80.66 ± 13.06 | 15.65 ± 5.30  | 0.19 ± 0.06 | 1 | 0.00 | 0.00 | 0.00 | 0.00   | 0.00   | 100.00 | 0.00 | 0.00   | 0.00 |
| P59S | 1 | -0.30 ± 0.30 | 80.69 ± 16.51  | 27.90 ± 14.82 | 50.05 ± 18.94 | 22.15 ± 6.64  | 0.45 ± 0.13 | 2 | 0.00 | 0.00 | 0.00 | 0.00   | 0.00   | 100.00 | 0.00 | 0.00   | 0.00 |
| P59L | 1 | -0.02 ± 0.08 | 80.69 ± 16.51  | 27.90 ± 14.82 | 50.05 ± 18.94 | 22.15 ± 6.64  | 0.45 ± 0.13 | 2 | 0.00 | 0.00 | 0.00 | 0.00   | 0.00   | 100.00 | 0.00 | 0.00   | 0.00 |
| P59Q | 1 | -0.83 ± 0.35 | 80.69 ± 16.51  | 27.90 ± 14.82 | 50.05 ± 18.94 | 22.15 ± 6.64  | 0.45 ± 0.13 | 2 | 0.00 | 0.00 | 0.00 | 0.00   | 100.00 | 0.00   | 0.00 | 0.00   | 0.00 |
| P59T | 1 | -0.14 ± 0.24 | 80.69 ± 16.51  | 27.90 ± 14.82 | 50.05 ± 18.94 | 22.15 ± 6.64  | 0.45 ± 0.13 | 2 | 0.00 | 0.00 | 0.00 | 0.00   | 100.00 | 0.00   | 0.00 | 0.00   | 0.00 |

**Table S2.** Analysis for detected co-occurring mutations in the predicted interface residues for SARS-CoV-2 M protein. This table describes the frequency of co-occurring mutations (Frequency), their  $\Delta\Delta G_{\text{binding}}$  values ( $\Delta\Delta G$ ), RMSF for each original residue (RMSF), solvent-accessible surface area (SASA) for each original residue in the complex (SASA<sub>cp</sub>), SASA for each original residue in the monomer (SASA<sub>mon</sub>),  $\Delta$ SASA for each original residue ( $\Delta$ SASA), relative SASA for each original residue (relSASA), the number of interactions each original residues establish (Interactions) and the distribution of co-occurring mutations across the GISAID clades (Clade) (all the presented results are mean values ± standard deviation).

| Co-occurrence | Frequency | Mutation | $\Delta\Delta G$ | RMSF      | SASA <sub>cp</sub> | SASA <sub>mon</sub> | $\Delta$ SASA | rel SASA    | Interactions | Clade (%) |      |      |        |        |        |      |        |      |
|---------------|-----------|----------|------------------|-----------|--------------------|---------------------|---------------|-------------|--------------|-----------|------|------|--------|--------|--------|------|--------|------|
|               |           |          | Mean ± SD        | Mean ± SD | Mean ± SD          | Mean ± SD           | Mean ± SD     | Mean ± SD   |              | L         | S    | V    | G      | GH     | GR     | GV   | GRY    | O    |
| M109L, V70L   | 8         | M109L    | 0.03 ± 0.35      | 118 ± 20  | 80.28 ± 22.41      | 168.22 ± 20.18      | 87.94 ± 14.46 | 0.52 ± 0.07 | 5            | 0.00      | 0.00 | 0.00 | 0.00   | 0.00   | 0.00   | 0.00 | 100.00 | 0.00 |
|               |           | V70L     |                  | 86 ± 19   | 15.82 ± 13.93      | 101.45 ± 11.56      | 85.63 ± 11.01 | 0.84 ± 0.10 | 6            |           |      |      |        |        |        |      |        |      |
| I82T, L93F    | 7         | I82T     | -0.5 ± 0.41      | 91 ± 20   | 38.67 ± 15.10      | 93.09 ± 13.33       | 54.42 ± 13.27 | 0.58 ± 0.12 | 4            | 0.00      | 0.00 | 0.00 | 0.00   | 100.00 | 0.00   | 0.00 | 0.00   | 0.00 |
|               |           | L93F     |                  | 80 ± 13   | 38.00 ± 19.35      | 107.19 ± 12.26      | 69.19 ± 9.59  | 0.65 ± 0.08 | 4            |           |      |      |        |        |        |      |        |      |
| I82T, R107L   | 4         | I82T     | 1.35 ± 0.64      | 91 ± 20   | 38.67 ± 15.10      | 93.09 ± 13.33       | 54.42 ± 13.27 | 0.58 ± 0.12 | 4            | 0.00      | 0.00 | 0.00 | 100.00 | 0.00   | 0.00   | 0.00 | 0.00   | 0.00 |
|               |           | R107L    |                  | 123 ± 38  | 134.74 ± 27.60     | 197.33 ± 18.99      | 62.60 ± 21.03 | 0.32 ± 0.10 | 2            |           |      |      |        |        |        |      |        |      |
| A85S, V70F    | 3         | A85S     | -0.72 ± 0.64     | 80 ± 13   | 6.65 ± 4.25        | 7.85 ± 4.73         | 1.21 ± 1.56   | 0.14 ± 0.17 | 2            | 0.00      | 0.00 | 0.00 | 0.00   | 0.00   | 100.00 | 0.00 | 0.00   | 0.00 |
|               |           | V70F     |                  | 86 ± 19   | 15.82 ± 13.93      | 101.45 ± 11.56      | 85.63 ± 11.01 | 0.84 ± 0.10 | 6            |           |      |      |        |        |        |      |        |      |
| A104V, V70L   | 3         | A104V    | -0.10 ± 0.32     | 105 ± 27  | 48.72 ± 14.21      | 62.41 ± 13.29       | 13.69 ± 8.89  | 0.21 ± 0.13 | 1            | 0.00      | 0.00 | 0.00 | 0.00   | 33.33  | 0.00   | 0.00 | 66.67  | 0.00 |

|             |   |       |              |          |                |                |               |             |   |      |        |      |        |        |        |        |      |      |
|-------------|---|-------|--------------|----------|----------------|----------------|---------------|-------------|---|------|--------|------|--------|--------|--------|--------|------|------|
|             |   | V70L  |              | 86 ± 19  | 15.82 ± 13.93  | 101.45 ± 11.56 | 85.63 ± 11.01 | 0.84 ± 0.10 | 6 |      |        |      |        |        |        |        |      |      |
| I82T, M109V | 2 | I82T  | -0.42 ± 0.50 | 91 ± 20  | 38.67 ± 15.10  | 93.09 ± 13.33  | 54.42 ± 13.27 | 0.58 ± 0.12 | 4 | 0.00 | 0.00   | 0.00 | 0.00   | 100.00 | 0.00   | 0.00   | 0.00 | 0.00 |
|             |   | M109V |              | 118 ± 20 | 80.28 ± 22.41  | 168.22 ± 20.18 | 87.94 ± 14.46 | 0.52 ± 0.07 | 5 |      |        |      |        |        |        |        |      |      |
| I82T, V70F  | 2 | I82T  | -0.22 ± 0.63 | 91 ± 20  | 38.67 ± 15.10  | 93.09 ± 13.33  | 54.42 ± 13.27 | 0.58 ± 0.12 | 4 | 0.00 | 0.00   | 0.00 | 100.00 | 0.00   | 0.00   | 0.00   | 0.00 | 0.00 |
|             |   | V70F  |              | 86 ± 19  | 15.82 ± 13.93  | 101.45 ± 11.56 | 85.63 ± 11.01 | 0.84 ± 0.10 | 6 |      |        |      |        |        |        |        |      |      |
| I82T, M109I | 2 | I82T  | -0.43 ± 0.44 | 91 ± 20  | 38.67 ± 15.10  | 93.09 ± 13.33  | 54.42 ± 13.27 | 0.58 ± 0.12 | 4 | 0.00 | 0.00   | 0.00 | 100.00 | 0.00   | 0.00   | 0.00   | 0.00 | 0.00 |
|             |   | M109I |              | 118 ± 20 | 80.28 ± 22.41  | 168.22 ± 20.18 | 87.94 ± 14.46 | 0.52 ± 0.07 | 5 |      |        |      |        |        |        |        |      |      |
| I82T, V66M  | 2 | I82T  | -0.5 ± 0.37  | 91 ± 20  | 38.67 ± 15.10  | 93.09 ± 13.33  | 54.42 ± 13.27 | 0.58 ± 0.12 | 4 | 0.00 | 0.00   | 0.00 | 50.00  | 0.00   | 50.00  | 0.00   | 0.00 | 0.00 |
|             |   | V66M  |              | 73 ± 15  | 14.52 ± 8.56   | 72.23 ± 9.42   | 57.72 ± 5.87  | 0.80 ± 0.07 | 4 |      |        |      |        |        |        |        |      |      |
| A69V, A85S  | 2 | A69V  | -1.32 ± 0.27 | 84 ± 16  | 1.59 ± 3.05    | 16.96 ± 6.77   | 15.37 ± 4.26  | 0.90 ± 0.12 | 2 | 0.00 | 0.00   | 0.00 | 100.00 | 0.00   | 0.00   | 0.00   | 0.00 | 0.00 |
|             |   | A85S  |              | 80 ± 13  | 6.65 ± 4.25    | 7.85 ± 4.73    | 1.21 ± 1.56   | 0.14 ± 0.17 | 2 |      |        |      |        |        |        |        |      |      |
| I82S, R107H | 2 | I82S  | 0.57 ± 0.74  | 91 ± 20  | 38.67 ± 15.10  | 93.09 ± 13.33  | 54.42 ± 13.27 | 0.58 ± 0.12 | 4 | 0.00 | 0.00   | 0.00 | 100.00 | 0.00   | 0.00   | 0.00   | 0.00 | 0.00 |
|             |   | R107H |              | 123 ± 38 | 134.74 ± 27.60 | 197.33 ± 18.99 | 62.60 ± 21.03 | 0.32 ± 0.10 | 2 |      |        |      |        |        |        |        |      |      |
| I97V, R107C | 2 | I97V  | 1.91 ± 0.55  | 90 ± 19  | 77.20 ± 19.03  | 96.61 ± 17.39  | 19.41 ± 6.87  | 0.20 ± 0.06 | 1 | 0.00 | 0.00   | 0.00 | 0.00   | 0.00   | 100.00 | 0.00   | 0.00 | 0.00 |
|             |   | R107C |              | 123 ± 38 | 134.74 ± 27.60 | 197.33 ± 18.99 | 62.60 ± 21.03 | 0.32 ± 0.10 | 2 |      |        |      |        |        |        |        |      |      |
| A104V, I82T | 1 | A104V | -0.59 ± 0.40 | 105 ± 27 | 48.72 ± 14.21  | 62.41 ± 13.29  | 13.69 ± 8.89  | 0.21 ± 0.13 | 1 | 0.00 | 0.00   | 0.00 | 0.00   | 0.00   | 100.00 | 0.00   | 0.00 | 0.00 |
|             |   | I82T  |              | 91 ± 20  | 38.67 ± 15.10  | 93.09 ± 13.33  | 54.42 ± 13.27 | 0.58 ± 0.12 | 4 |      |        |      |        |        |        |        |      |      |
| I82T, V66L  | 1 | I82T  | -0.57 ± 0.39 | 91 ± 20  | 38.67 ± 15.10  | 93.09 ± 13.33  | 54.42 ± 13.27 | 0.58 ± 0.12 | 4 | 0.00 | 0.00   | 0.00 | 0.00   | 0.00   | 0.00   | 100.00 | 0.00 | 0.00 |
|             |   | V66L  |              | 73 ± 15  | 14.52 ± 8.56   | 72.23 ± 9.42   | 57.72 ± 5.87  | 0.80 ± 0.07 | 4 |      |        |      |        |        |        |        |      |      |
| A85S, I82T  | 1 | A85S  | -1.47 ± 0.47 | 80 ± 13  | 6.65 ± 4.25    | 7.85 ± 4.73    | 1.21 ± 1.56   | 0.14 ± 0.17 | 2 | 0.00 | 0.00   | 0.00 | 0.00   | 100.00 | 0.00   | 0.00   | 0.00 | 0.00 |
|             |   | I82T  |              | 91 ± 20  | 38.67 ± 15.10  | 93.09 ± 13.33  | 54.42 ± 13.27 | 0.58 ± 0.12 | 4 |      |        |      |        |        |        |        |      |      |
| I82S, V70F  | 1 | I82S  | -0.35 ± 0.64 | 91 ± 20  | 38.67 ± 15.10  | 93.09 ± 13.33  | 54.42 ± 13.27 | 0.58 ± 0.12 | 4 | 0.00 | 0.00   | 0.00 | 100.00 | 0.00   | 0.00   | 0.00   | 0.00 | 0.00 |
|             |   | V70F  |              | 86 ± 19  | 15.82 ± 13.93  | 101.45 ± 11.56 | 85.63 ± 11.01 | 0.84 ± 0.10 | 6 |      |        |      |        |        |        |        |      |      |
| A69V, I82S  | 1 | A69V  | -0.65 ± 0.39 | 84 ± 16  | 1.59 ± 3.05    | 16.96 ± 6.77   | 15.37 ± 4.26  | 0.90 ± 0.12 | 2 | 0.00 | 100.00 | 0.00 | 0.00   | 0.00   | 0.00   | 0.00   | 0.00 | 0.00 |
|             |   | I82S  |              | 91 ± 20  | 38.67 ± 15.10  | 93.09 ± 13.33  | 54.42 ± 13.27 | 0.58 ± 0.12 | 4 |      |        |      |        |        |        |        |      |      |

|             |   |       |              |          |               |                |               |             |   |      |      |      |      |        |        |        |        |      |
|-------------|---|-------|--------------|----------|---------------|----------------|---------------|-------------|---|------|------|------|------|--------|--------|--------|--------|------|
| A104V, V70F | 1 | A104V |              | 105 ± 27 | 48.72 ± 14.21 | 62.41 ± 13.29  | 13.69 ± 8.89  | 0.21 ± 0.13 | 1 | 0.00 | 0.00 | 0.00 | 0.00 | 0.00   | 100.00 | 0.00   | 0.00   | 0.00 |
|             |   | V70F  | 0.09 ± 0.54  | 86 ± 19  | 15.82 ± 13.93 | 101.45 ± 11.56 | 85.63 ± 11.01 | 0.84 ± 0.10 | 6 |      |      |      |      |        |        |        |        |      |
| A85V, V70F  | 1 | A85V  |              | 80 ± 13  | 6.65 ± 4.25   | 7.85 ± 4.73    | 1.21 ± 1.56   | 0.14 ± 0.17 | 2 | 0.00 | 0.00 | 0.00 | 0.00 | 0.00   | 0.00   | 0.00   | 100.00 | 0.00 |
|             |   | V70F  | 0.02 ± 0.47  | 86 ± 19  | 15.82 ± 13.93 | 101.45 ± 11.56 | 85.63 ± 11.01 | 0.84 ± 0.10 | 6 |      |      |      |      |        |        |        |        |      |
| A85S, M109V | 1 | A85S  |              | 80 ± 13  | 6.65 ± 4.25   | 7.85 ± 4.73    | 1.21 ± 1.56   | 0.14 ± 0.17 | 2 | 0.00 | 0.00 | 0.00 | 0.00 | 100.00 | 0.00   | 0.00   | 0.00   | 0.00 |
|             |   | M109V | -0.86 ± 0.40 | 118 ± 20 | 80.28 ± 22.41 | 168.22 ± 20.18 | 87.94 ± 14.46 | 0.52 ± 0.07 | 5 |      |      |      |      |        |        |        |        |      |
| A69S, M109L | 1 | A69S  |              | 84 ± 16  | 1.59 ± 3.05   | 16.96 ± 6.77   | 15.37 ± 4.26  | 0.90 ± 0.12 | 2 | 0.00 | 0.00 | 0.00 | 0.00 | 0.00   | 100.00 | 0.00   | 0.00   | 0.00 |
|             |   | M109L | -1.16 ± 0.30 | 118 ± 20 | 80.28 ± 22.41 | 168.22 ± 20.18 | 87.94 ± 14.46 | 0.52 ± 0.07 | 5 |      |      |      |      |        |        |        |        |      |
| A104V, A69S | 1 | A104V |              | 105 ± 27 | 48.72 ± 14.21 | 62.41 ± 13.29  | 13.69 ± 8.89  | 0.21 ± 0.13 | 1 | 0.00 | 0.00 | 0.00 | 0.00 | 0.00   | 100.00 | 0.00   | 0.00   | 0.00 |
|             |   | A69S  | -1.32 ± 0.28 | 84 ± 16  | 1.59 ± 3.05   | 16.96 ± 6.77   | 15.37 ± 4.26  | 0.90 ± 0.12 | 2 |      |      |      |      |        |        |        |        |      |
| A69F, V70L  | 1 | A69F  |              | 84 ± 16  | 1.59 ± 3.05   | 16.96 ± 6.77   | 15.37 ± 4.26  | 0.90 ± 0.12 | 2 | 0.00 | 0.00 | 0.00 | 0.00 | 0.00   | 0.00   | 0.00   | 100.00 | 0.00 |
|             |   | V70L  | -0.14 ± 0.36 | 86 ± 19  | 15.82 ± 13.93 | 101.45 ± 11.56 | 85.63 ± 11.01 | 0.84 ± 0.10 | 6 |      |      |      |      |        |        |        |        |      |
| A69S, L93M  | 1 | A69S  |              | 84 ± 16  | 1.59 ± 3.05   | 16.96 ± 6.77   | 15.37 ± 4.26  | 0.90 ± 0.12 | 2 | 0.00 | 0.00 | 0.00 | 0.00 | 0.00   | 0.00   | 100.00 | 0.00   | 0.00 |
|             |   | L93M  | -1.22 ± 0.23 | 80 ± 13  | 38.00 ± 19.35 | 107.19 ± 12.26 | 69.19 ± 9.59  | 0.65 ± 0.08 | 4 |      |      |      |      |        |        |        |        |      |

**Table S3.** Equilibration systems details for: i) M protein monomer; systems with M protein and membrane were equilibrated with OPM [1], TMpred [2], TMHMM [3,4], PSIPRED [5,6], CCTOP [7,8] and SACS MEMSAT [9] membrane orientation prediction; ii) M protein dimer, two M monomers with TMHMM [3,4] membrane orientation and membrane were equilibrated. Systems sizes, solvents (water and ions—Na<sup>+</sup> and Cl<sup>-</sup>) and membrane lipids (POPC—phosphatidylcholine, Cholesterol, SAPI24 and SAPI25—phosphatidylinositol, POPE—phosphatidylethanolamine, POPS—phosphatidylserine and PSM—sphingolipid) constitution are listed herein.

|                 |                  | Monomer |        |       |         |       |             | Dimer |
|-----------------|------------------|---------|--------|-------|---------|-------|-------------|-------|
|                 |                  | OPM     | TMpred | TMHMM | PSIPRED | CCTOP | SACS MEMSAT |       |
| System size     | x                | 14.21   | 14.21  | 14.21 | 14.21   | 14.21 | 14.21       | 11.94 |
|                 | y                | 14.21   | 14.21  | 14.21 | 14.21   | 14.21 | 14.21       | 11.94 |
|                 | z                | 12.21   | 12.21  | 12.21 | 12.21   | 12.21 | 12.21       | 11.60 |
| Solvent         | H <sub>2</sub> O | 48949   | 48918  | 48954 | 48935   | 49005 | 48935       | 31319 |
|                 | Na <sup>+</sup>  | 1045    | 1047   | 1045  | 1046    | 1044  | 1043        | 235   |
|                 | Cl <sup>-</sup>  | 797     | 799    | 798   | 798     | 796   | 795         | 83    |
| Membrane Lipids | POPC             | 370     | 370    | 370   | 370     | 370   | 370         | 245   |
|                 | POPE             | 132     | 132    | 132   | 132     | 132   | 132         | 88    |
|                 | SAPI24           | 30      | 30     | 30    | 30      | 30    | 30          | 26    |
|                 | SAPI25           | 30      | 30     | 30    | 30      | 30    | 30          | 26    |
|                 | POPS             | 18      | 18     | 18    | 18      | 18    | 18          | 12    |
|                 | PSM              | 18      | 18     | 18    | 18      | 18    | 18          | 12    |
|                 | Cholesterol      | 2       | 2      | 2     | 2       | 2     | 2           | 2     |

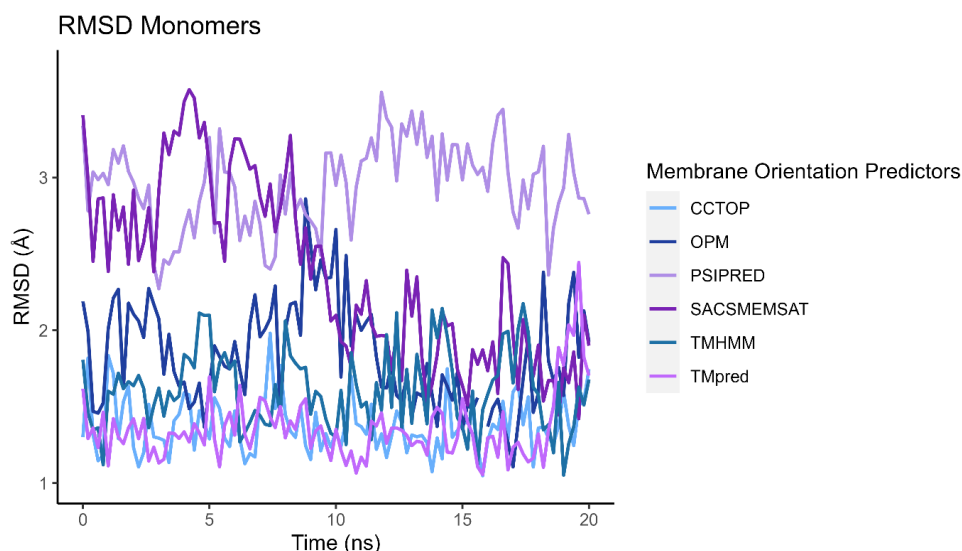

**Figure S1.** RMSD results for all monomer transmembrane predictions for SARS-CoV-2 M protein during the equilibration.

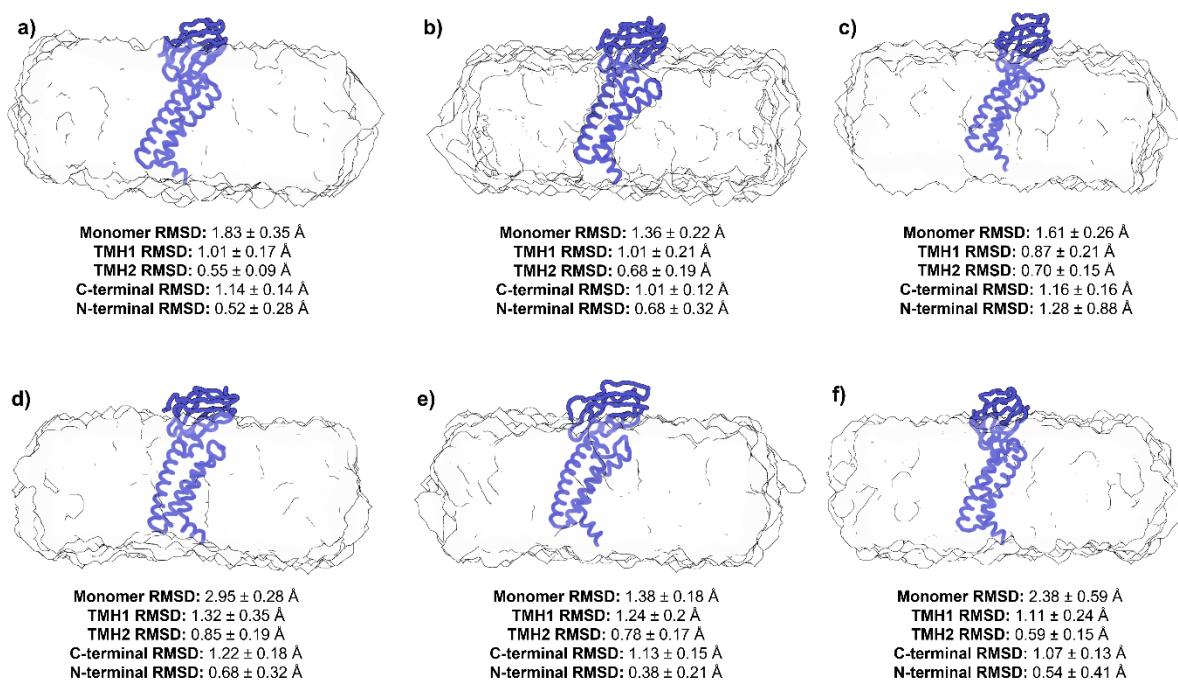

**Figure S2.** SARS-CoV-2 M protein monomer transmembrane prediction: OPM [1], TMpred [2], TMHMM [3,4], PSIPRED [5,6], CCTOP [7,8] and SACS MEMSAT [9].

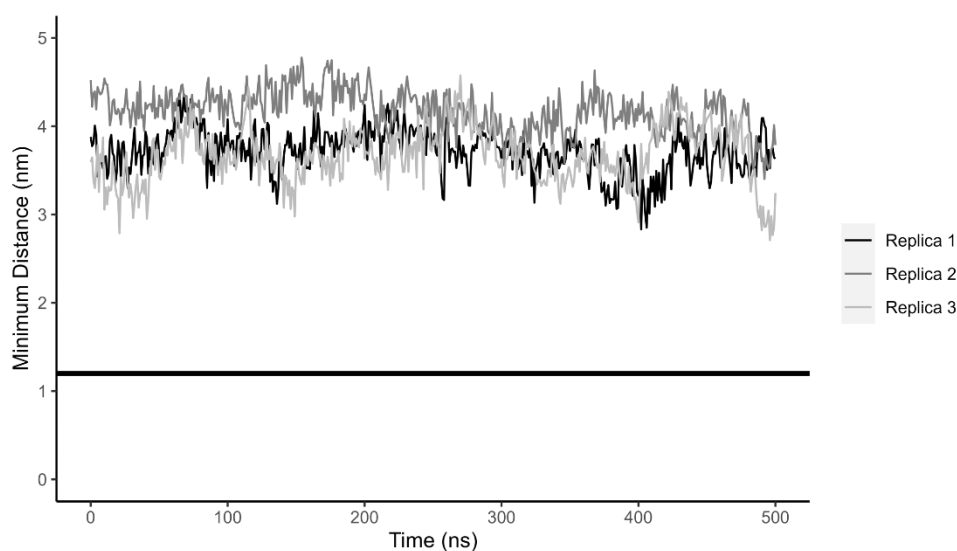

**Figure S3.** Minimum Distance between periodic images during the MD simulation for the three replicas. Straight horizontal black line, at value 1.2, represents the minimal acceptable distance between periodic images to avoid direct interactions between neighboring images. All replicas showed a minimum distance superior to the threshold.

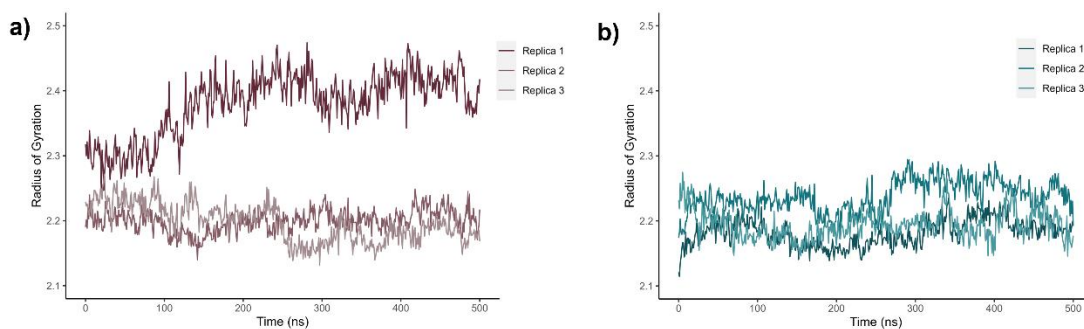

**Figure S4.** Radius of gyration of (a) monomer A and (b) monomer B three replicas throughout the MD simulation time. Monomer A shows a stable radius of gyration. However, the values for monomer B only became stable after 300 ns, which justifies the use of just the last 200 ns for subsequent analysis.

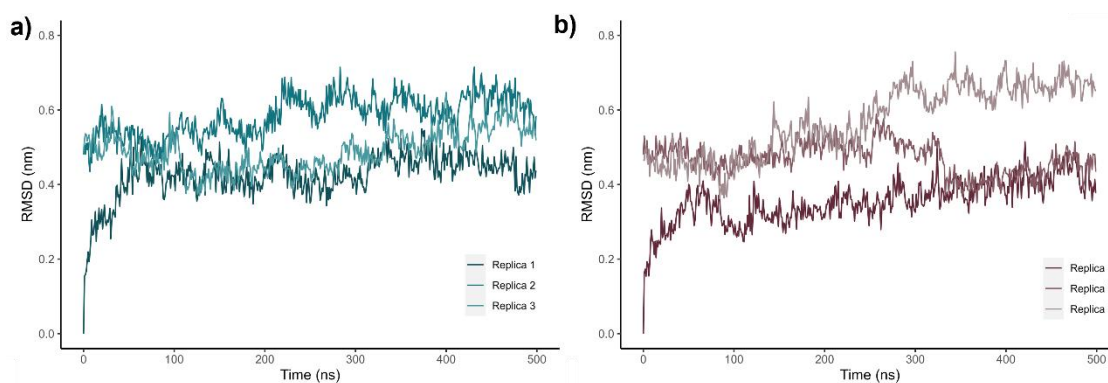

**Figure S5.** RMSD values of (a) monomer A and (b) monomer B three replicas throughout the MD simulation time. RMSD values became more stable after 300 ns, further strengthening the decision to use the last 200 ns for subsequent analysis.

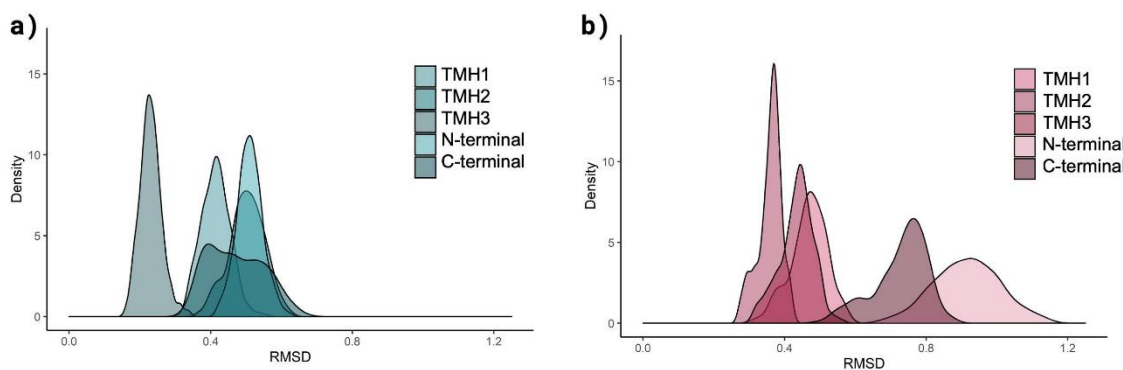

**Figure S6.** RMSD results for MD simulations split by TMH1, TMH2, TMH3, N-terminal and C-terminal: (a) monomer A, and (b) monomer B.

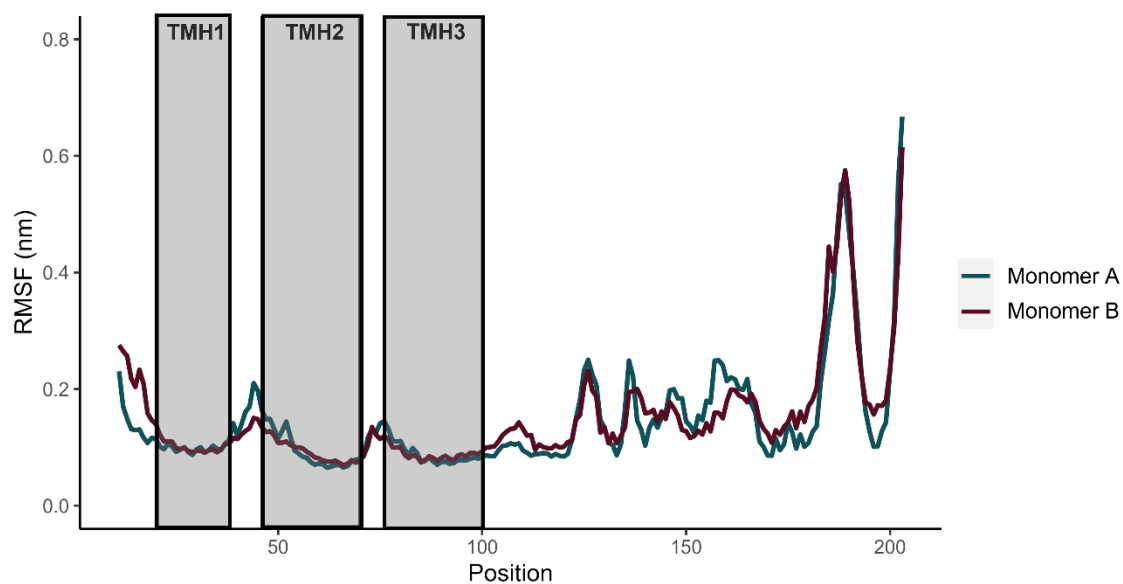

**Figure S7.** RMSF results for MD simulations split by monomers A and B. TMH1, TMH2 and TMH3 correspondent residues are highlighted as grey areas.

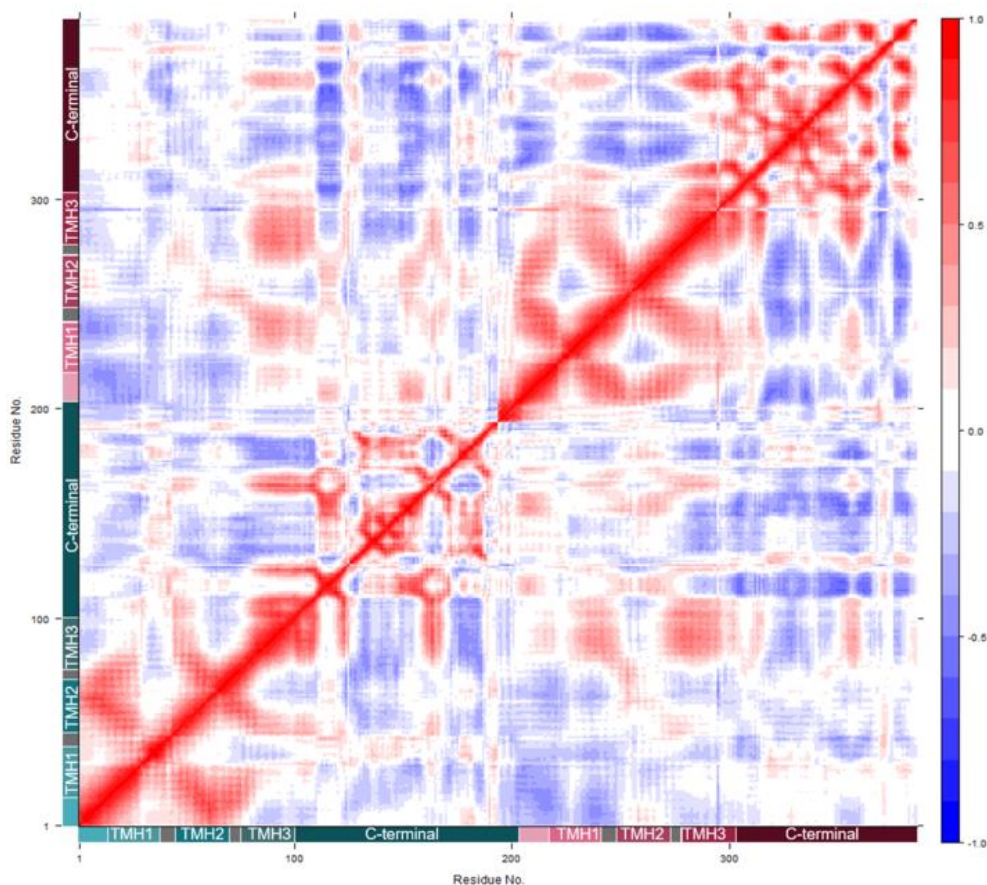

**Figure S8.** Residue CCA between M protein dimer monomer A and monomer B. All regions are colored according to Figure 3 color scheme.

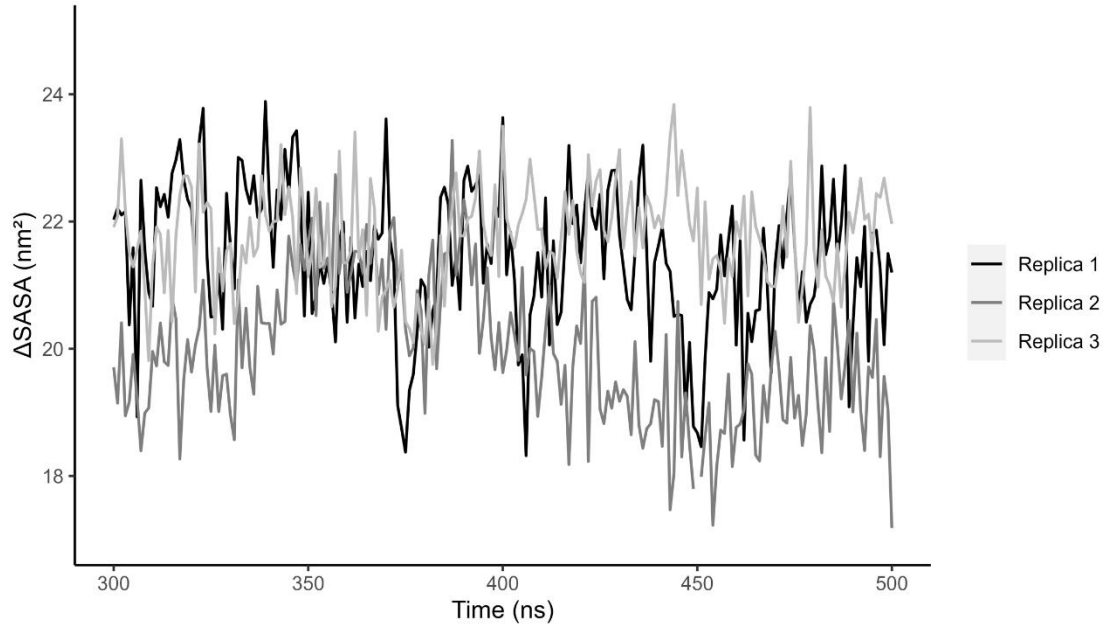

**Figure S9.** Average  $\Delta$ SASA values of the interfacial residues.  $\Delta$ SASA values were calculated by subtracting the SASA values of the complex with the SASA values of the individual monomers. This plot clearly shows the constancy of this values across the simulations, further demonstrating the convergence of the simulations.

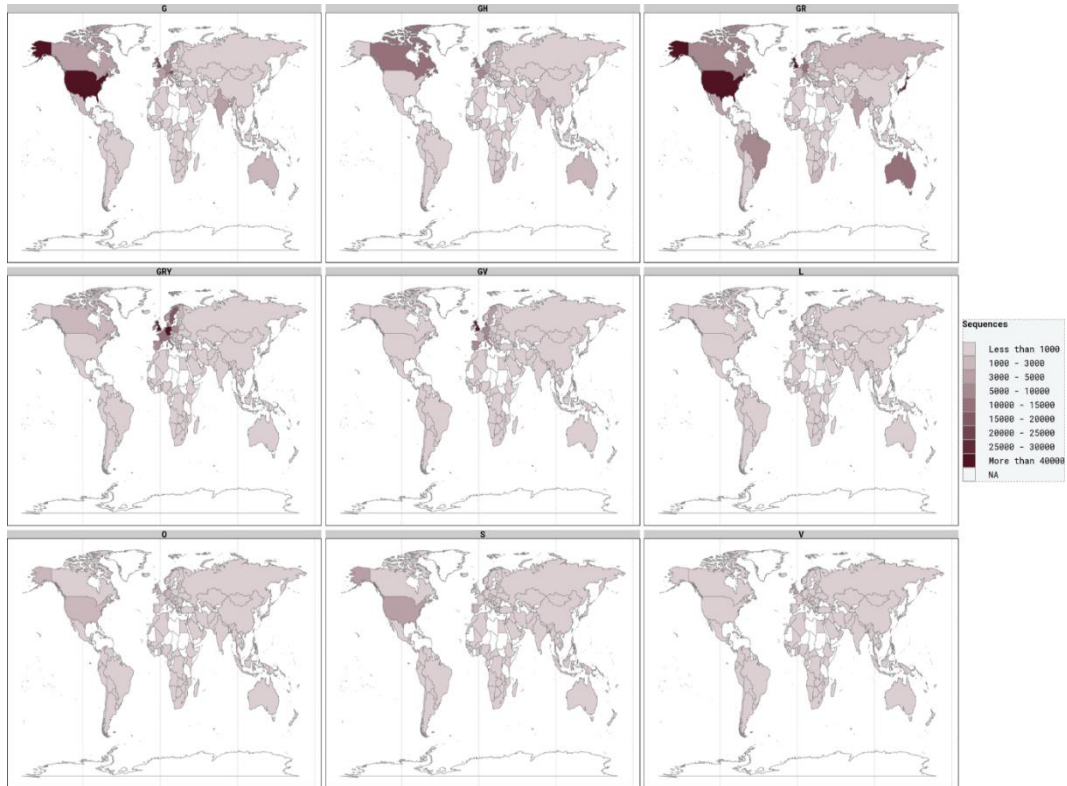

**Figure S10.** GISAID data analysis by clades. Clade S includes variants A, clade V variants B.2, clade L variants B, clade G variants B.1, clade GH variants B.1.\*, clade GV variants B.1.177, clade GR variants B.1.1.1 and clade GRY variants B.1.1.7.

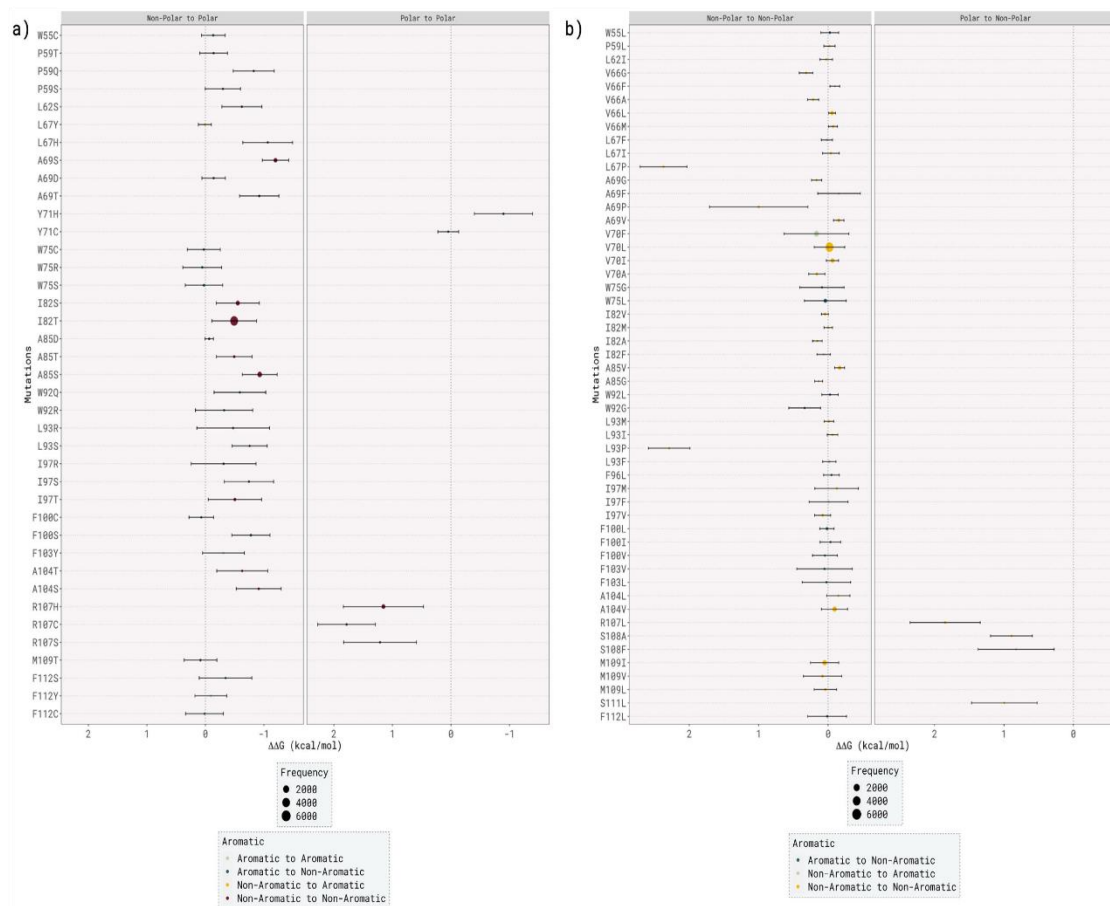

**Figure S11.**  $\Delta\Delta G_{\text{binding}}$  values of predicted interfacial residues split into (a) Non-polar to Non-polar residues and Polar to Non-polar residues; and (b) Non-Polar to Polar residues and Polar to Polar residues. Size corresponds to the number of times a SNP occurred in all 1,271,550 analyzed sequences. Color represents the alteration from Aromatic to Aromatic (sage), Aromatic to Non-aromatic (teal), Non-aromatic to Aromatic (yellow) and Non-aromatic to Non-aromatic (garnet) (all the presented results are mean values  $\pm$  standard deviation).

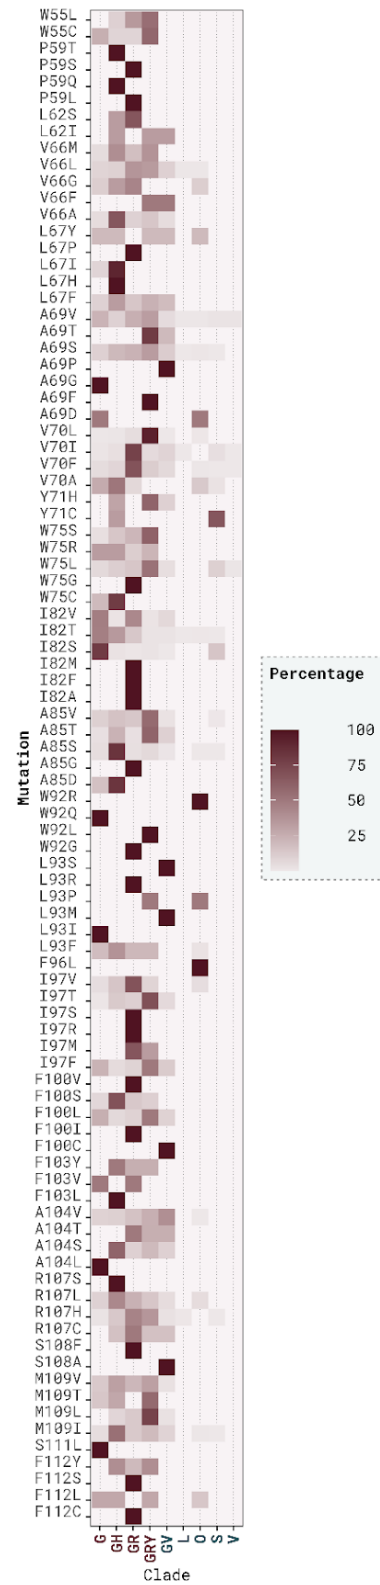

**Figure S12.** Distribution across Clades of SARS-CoV-2 M protein sequences. Clade color is related to it encompassing VOC (garnet) and VOI (teal).

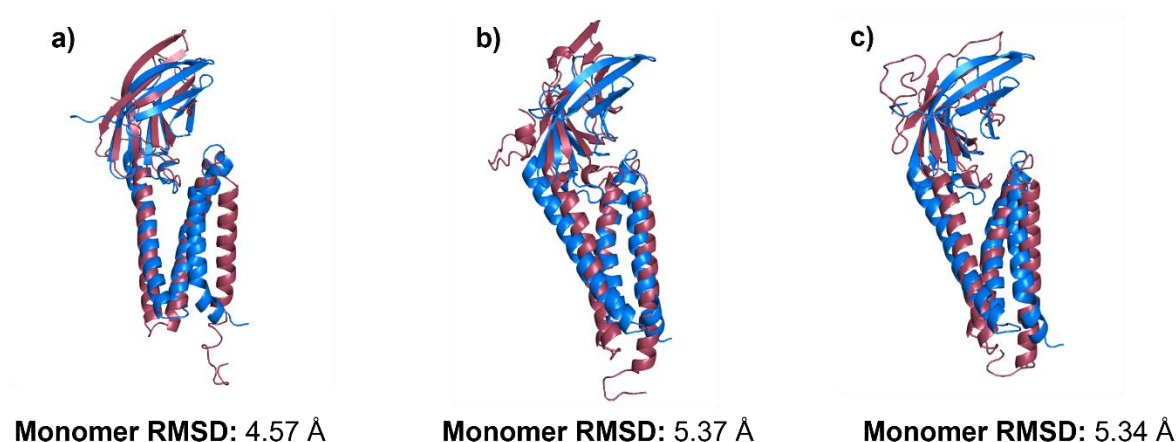

**Figure S13.** Overlay of the obtained monomer after equilibration (blue) and: (a) the Feig's laboratory "second" monomer prediction [10]; (b) The Feig's laboratory "first" monomer prediction [10]; (c) Zhang et al. monomer prediction [11]. Mean values for the RMSD between both structures are also shown.

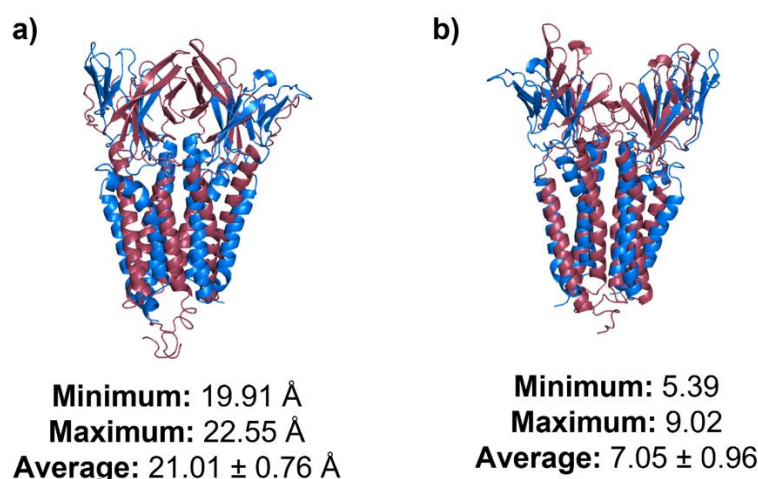

**Figure S14.** Overlay of the predicted homodimer structure (blue) and (a) the most recent homodimer predicted by Feig's laboratory ("closed" conformation) [12]; (b) the first homodimer predicted by Feig's laboratory ("open conformation") [12]. Mean and standard deviation values for the RMSD between both structures are also shown.

## References

1. Lomize, M.A.; Pogozheva, I.D.; Joo, H.; Mosberg, H.I.; Lomize, A.L. OPM database and PPM web server: Resources for positioning of proteins in membranes. *Nucleic Acids Res.* **2012**, *40*, D370–D376.
2. Hofman, K. TMbase-a database of membrane spanning proteins segments. *Biol. Chem. Hoppe Seyler.* **1993**, *374*, 166.
3. Sonnhammer, E.L.; von Heijne, G.; Krogh, A. A hidden Markov model for predicting transmembrane helices in protein sequences. *Proc. Int. Conf. Intell. Syst. Mol. Biol.* **1998**, *6*, 175–182.
4. Krogh, A.; Larsson, B.; von Heijne, G.; Sonnhammer, E.L. Predicting transmembrane protein topology with a hidden Markov model: Application to complete genomes. *J. Mol. Biol.* **2001**, *305*, 567–580.
5. Buchan, D.W.A.; Jones, D.T. The PSIPRED Protein Analysis Workbench: 20 years on. *Nucleic Acids Res.* **2019**, *47*, W402–W407.
6. Jones, D.T. Protein secondary structure prediction based on position-specific scoring matrices. *J. Mol. Biol.* **1999**, *292*, 195–202.
7. Dobson, L.; Reményi, I.; Tusnády, G.E. CCTOP: A Consensus Constrained TOPology prediction web server. *Nucleic Acids Res.* **2015**, *43*, W408–W412.
8. Dobson, L.; Reményi, I.; Tusnády, G.E. The human transmembrane proteome. *Biol. Direct.* **2015**, *10*, 31.
9. Jones, D.T.; Taylor, W.R.; Thornton, J.M. A model recognition approach to the prediction of all-helical membrane protein structure and topology. *Biochemistry* **1994**, *33*, 3038–3049.
10. Heo, L.; Feig, M. Modeling of severe acute respiratory syndrome coronavirus 2 (SARS-CoV-2) proteins by machine learning and physics-based refinement. *bioRxiv.* **2020**, doi:10.1101/2020.03.25.008904.

11. Zhang, C.; Zheng, W.; Huang, X.; Bell, E.W.; Zhou, X.; Zhang, Y. Protein structure and sequence reanalysis of 2019-nCoV genome refutes snakes as its intermediate host and the unique similarity between its spike protein insertions and HIV-1. *J. Proteome Res.* **2020**, *19*, 1351–1360.
12. Feig, M. SARS-Cov-2 Protein Structure Models. Available online: <https://github.com/feiglab/sars-cov-2-proteins> (accessed on 19 February 2022).
